# Supplementary material
Source: PubMed Central journal article supplement (PMC4830462)

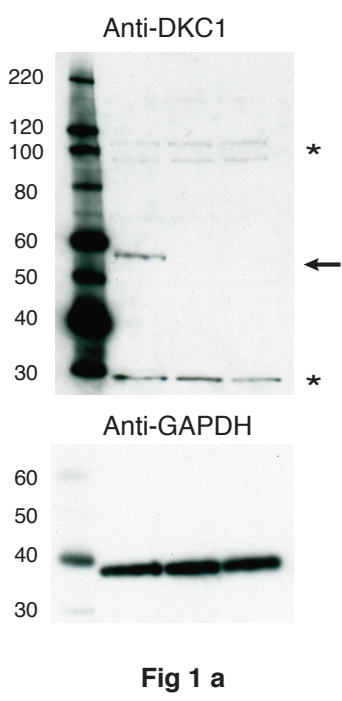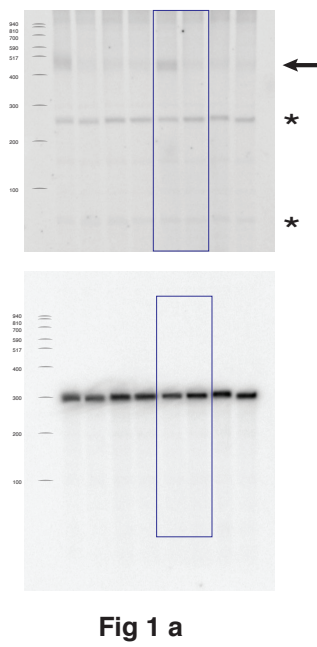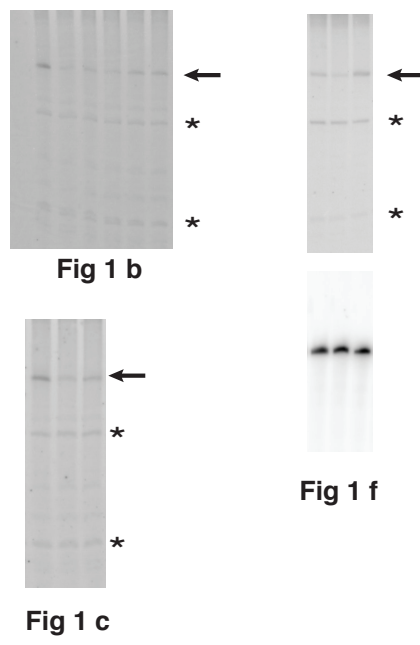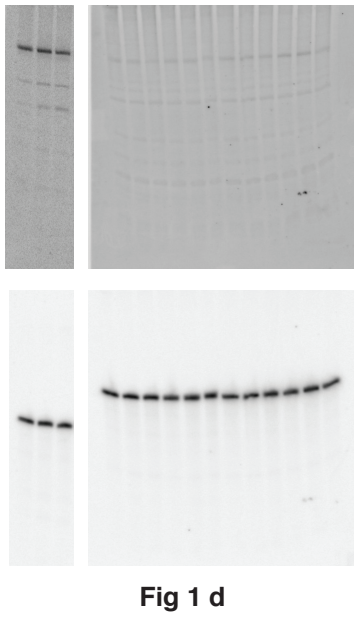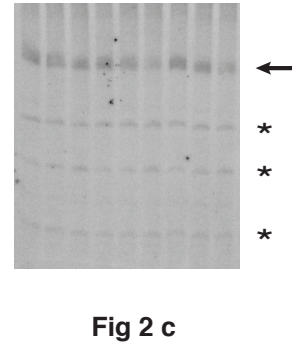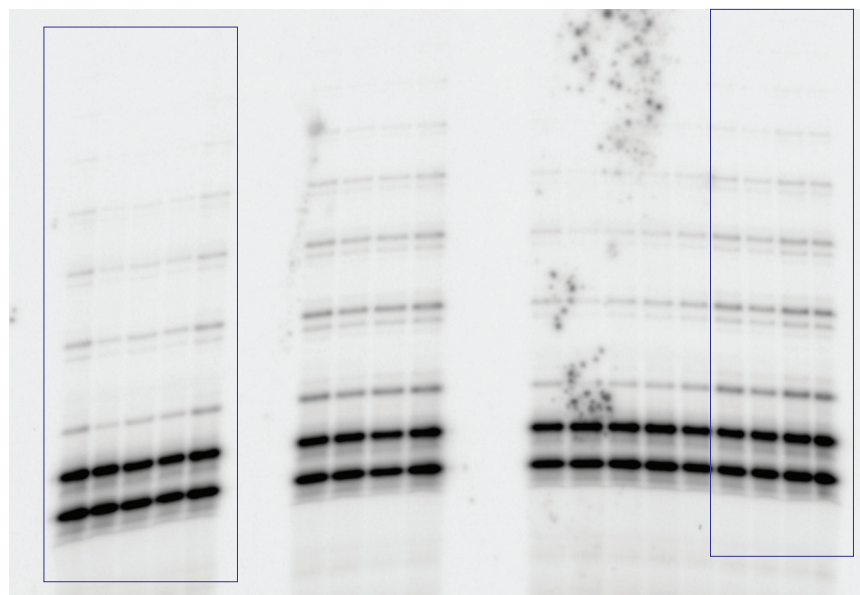

Fig 3

\* 'non-specific'

Supplement: NIHMS771431-supplement-2.pdf [file NIHMS771431-supplement-2.pdf]
